# Supplementary material for: Evolution and regulation of nitrogen flux through compartmentalized metabolic networks in a marine diatom
Source: PubMed Central journal article supplement (PMC6779911; doi:10.1038/s41467-019-12407-y), 2019-10-07
Supplement: 41467_2019_12407_MOESM1_ESM.pdf [file 41467_2019_12407_MOESM1_ESM.pdf]

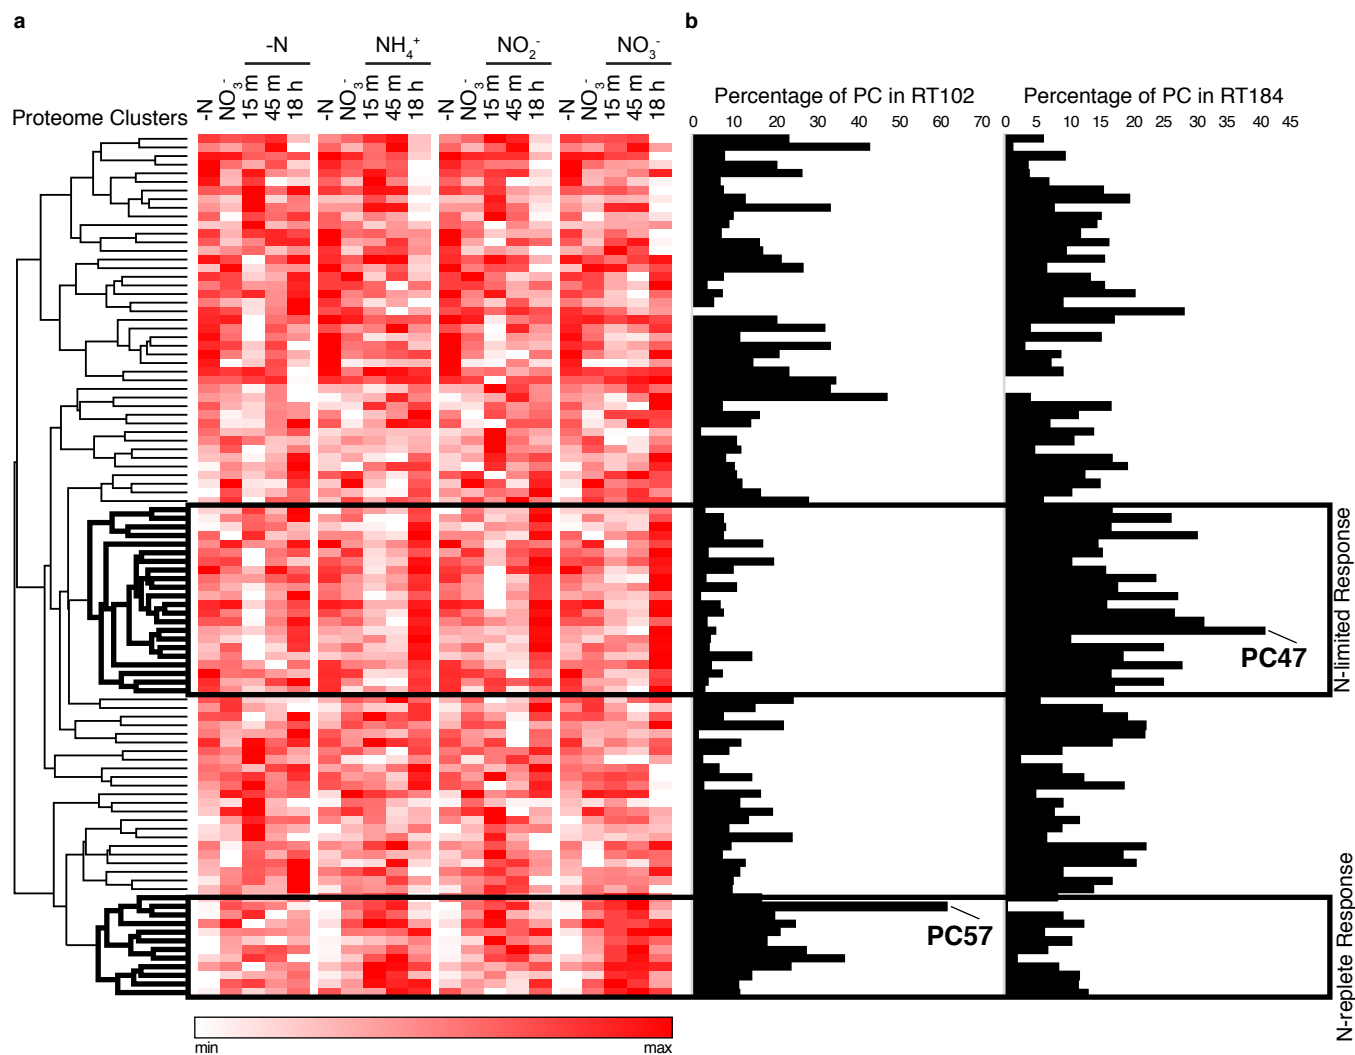

**Supplementary Figure 1: Proteome expression and overlap with two major transcriptome response types (RT102, RT184).**

(a) Heatmap shows average protein expression of all genes contained within each proteome cluster (PC,  $n = 100$ ), standardized first within treatment and then across all treatments. PC expression averages were then clustered hierarchically, shown by the represented dendrogram. (b) The proportion of genes within each PC belonging to either of the two major RTs. Generally, PCs that were upregulated in N-replete conditions (i.e. PC57) were represented in RT102, while PCs that were upregulated in N-limited conditions (i.e. PC47) were more represented in RT184. Source data are provided as a Source Data file.

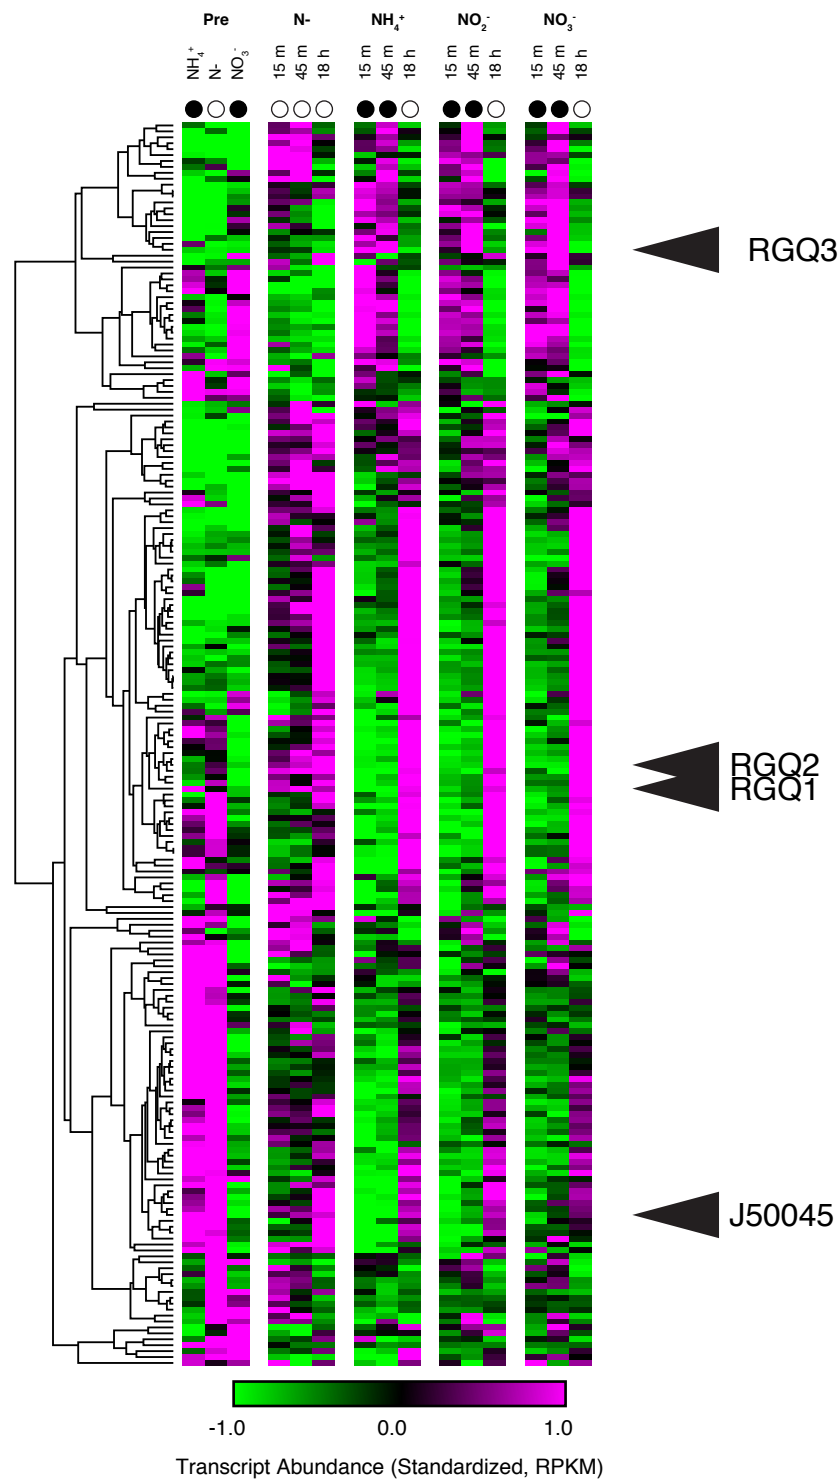

**Supplementary Figure 2: Expression of transcription factors in the Nshort experiment.**

Heatmap shows standardized transcript abundance of annotated transcription factors in *P. tricornutum* (Rayko et al. 2012). Dendrogram shows hierarchical clustering (one-minus pearson, average linkage). Closed circles indicate nitrogen-replete time points, open circles indicate nitrogen-deplete time points. Black arrows indicate transcription factors implicated in the regulation of nitrogen metabolism (Matthijs et al. 2016) and the putative *NirA* homolog identified in *P. tricornutum*. Source data are provided as a Source Data file.

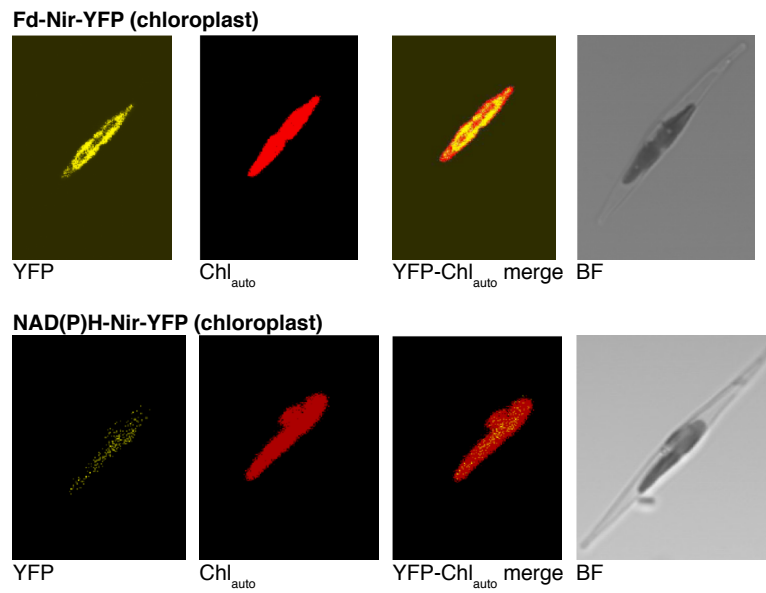

**Supplementary Figure 3: Chloroplast localization of Fd-Nir and NAD(P)H-Nir in *P. tricornutum*.**

Cells transformed with yellow fluorescent protein (YFP) tagged Fd-Nir and NAD(P)H-Nir were used to examine subcellular localization of both nitrite reductase isozymes in *P. tricornutum*. From left to right, micrographs show YFP fluorescence (yellow), location of chloroplast from detection of chlorophyll autofluorescence (red, Chl<sub>auto</sub>), merged YFP-Chl<sub>auto</sub>, and brightfield (BF).

**a UT1 (plasma membrane)**

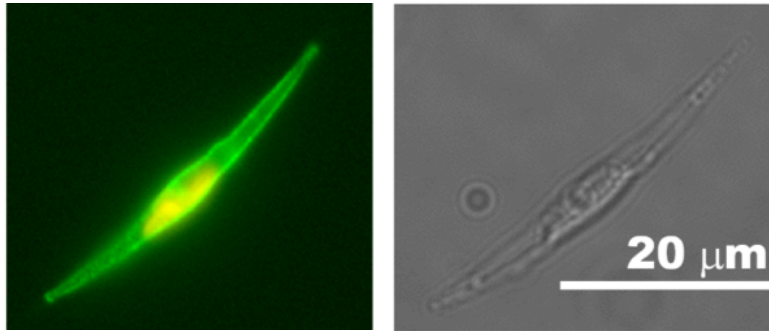

YFP-Chl<sub>auto</sub> merge

BF

**b UT3 (mitochondria)**

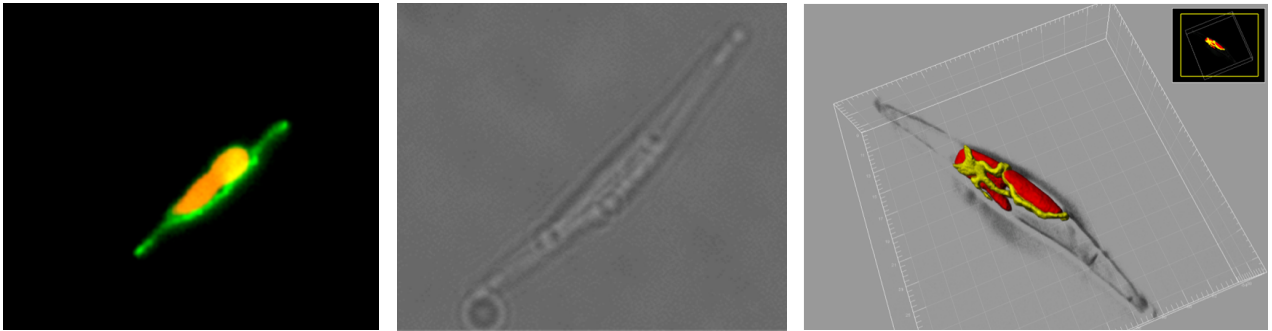

YFP-Chl<sub>auto</sub> merge

BF

YFP-Chl<sub>auto</sub> Confocal

**c Urease (mitochondria)**

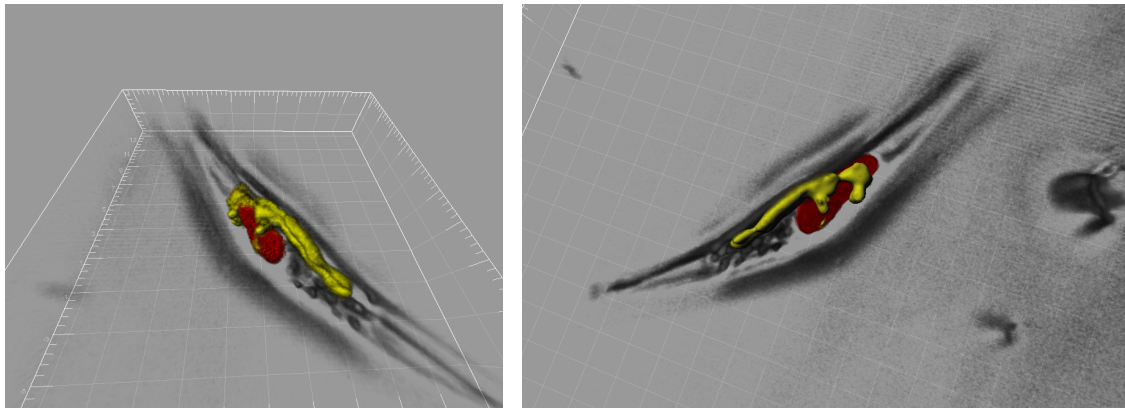

YFP-Chl<sub>auto</sub> Confocal

**Supplementary Figure 4: Subcellular localization of urea assimilation genes.**

Cells transformed with yellow fluorescent protein (YFP) tagged (a) YFP-UT1, (b) YFP-UT3, and (c) YFP-urease were used to examine subcellular localization. (a,b) From left to right, micrographs show merged images of YFP fluorescence (yellow) with chlorophyll autofluorescence (red, Chl<sub>auto</sub>), and brightfield (BF). (b,c) Composite 3D confocal image (far right in b), showing mitochondrial localization of UT3 (b) and urease (c).

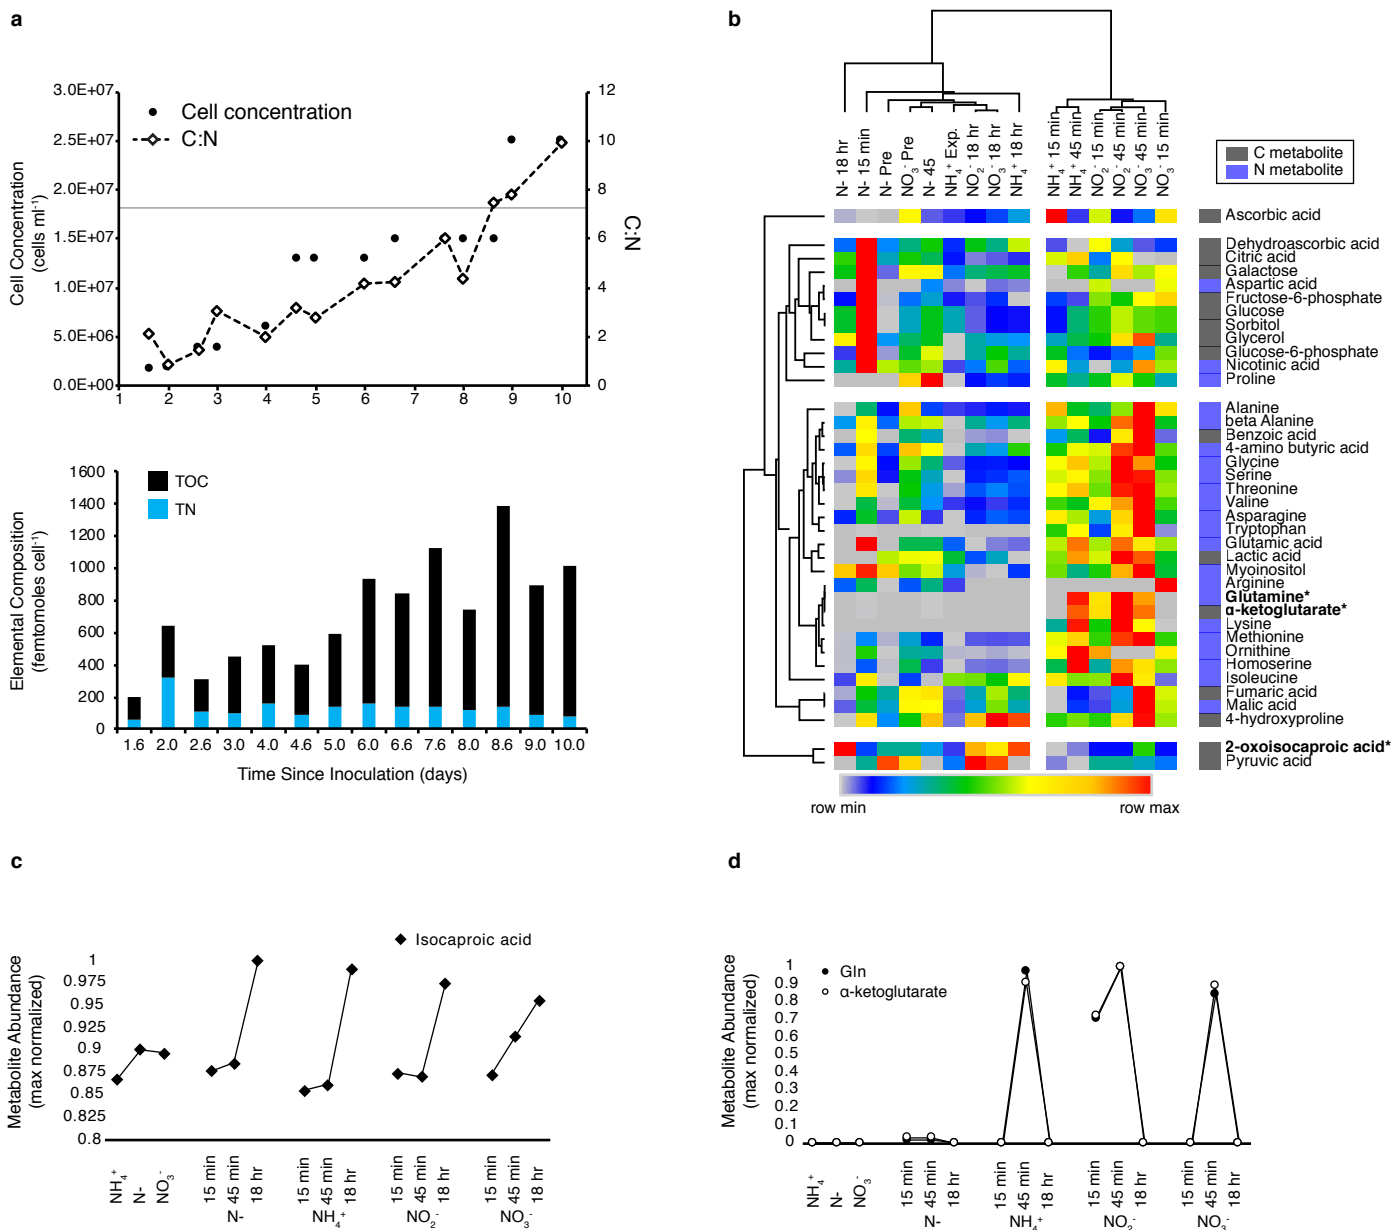

**Supplementary Figure 5: Cellular C and N quotas and metabolite composition in *P. tricornutum*.**

(a) Cell concentration, C:N, and elemental composition of *P. tricornutum* grown in batch culture, TOC: Total organic carbon, TN: Total nitrogen (b) Metabolite composition of *P. tricornutum* from  $N_{\text{short}}$  experiment, max-normalized. Light grey values indicate metabolite was not detected. \*Metabolites plotted in (c,d). (c) Isocaproic acid abundance from the  $N_{\text{short}}$  experiment. (d) Glutamine and  $\alpha$ -ketoglutarate abundance from the  $N_{\text{short}}$  experiment. Source data are provided as a Source data file.

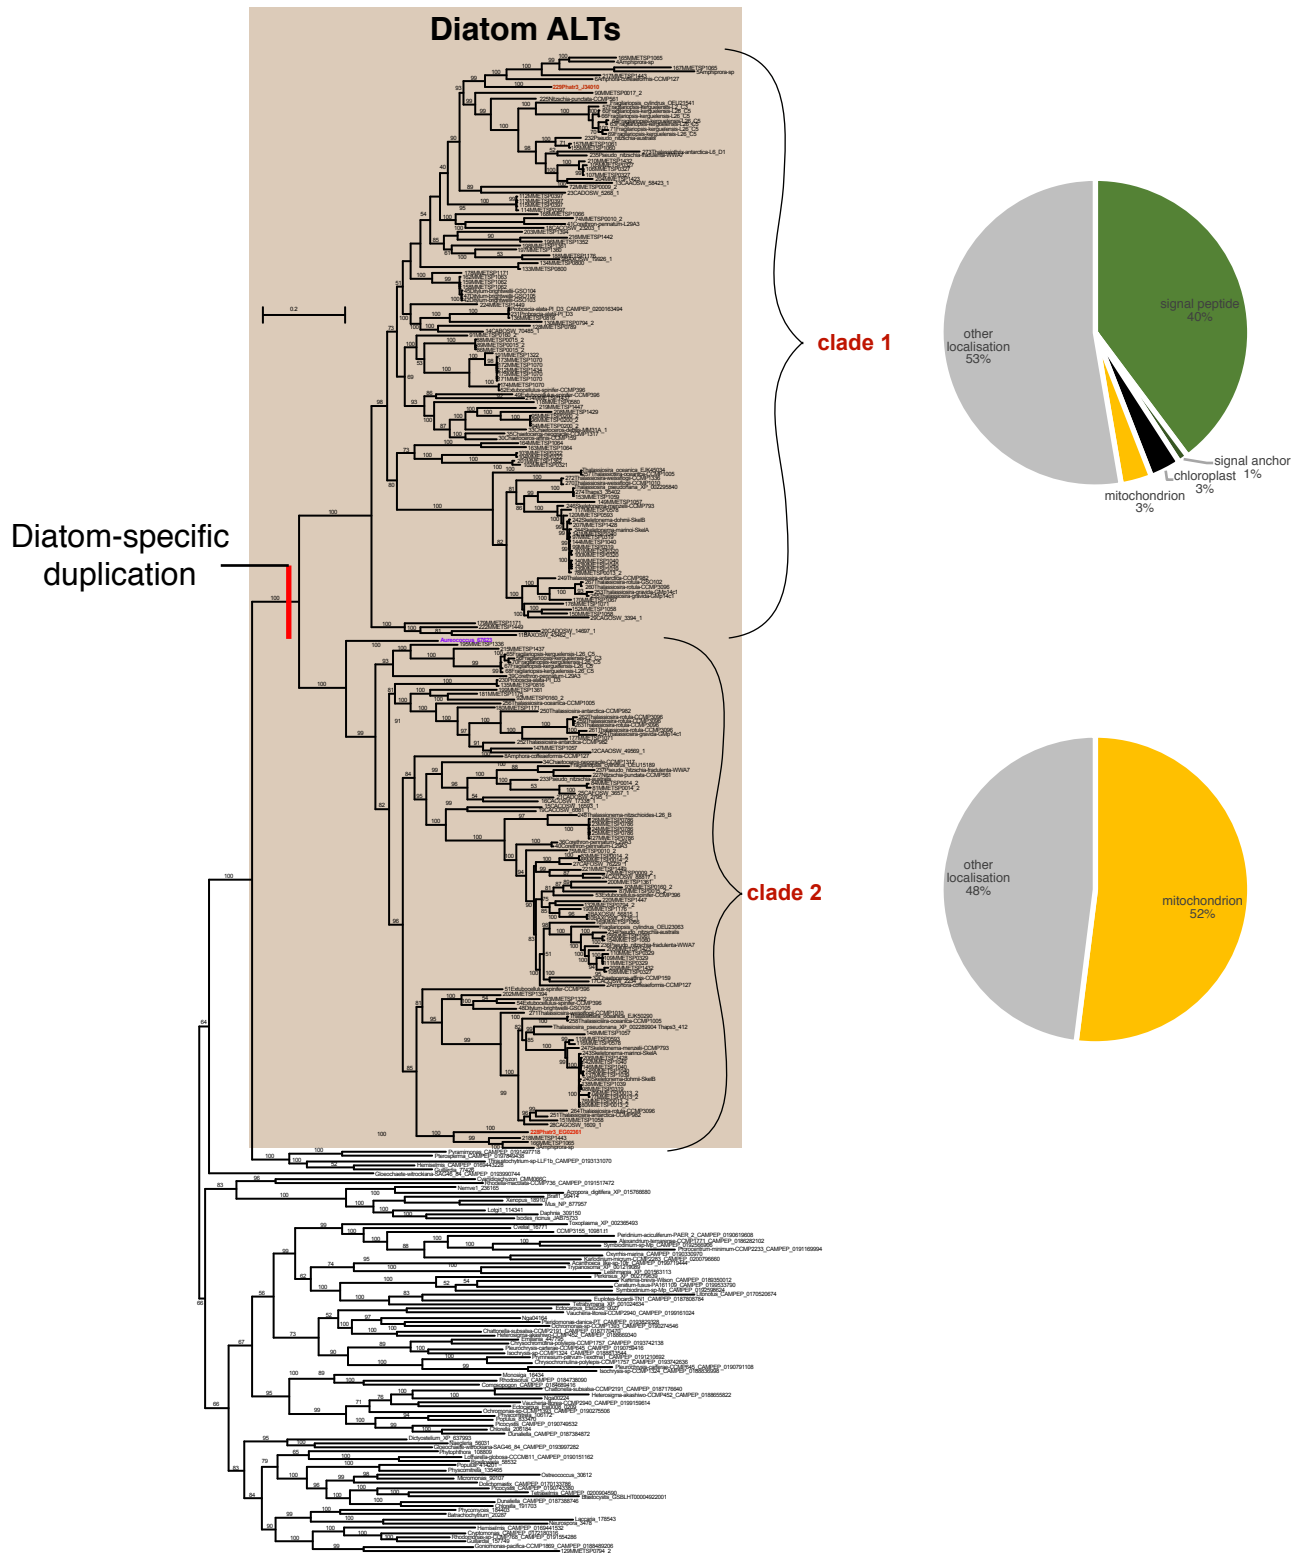

**Supplementary Figure 6: Alanine transaminase phylogeny and subcellular localization predictions.**

Expanded phylogeny of alanine transaminase (ALT) including diatom sequences from the MMETSP. There are two major diatom ALT clades, which are the result of a diatom-specific ALT duplication (indicated). Sequences from *P. tricornutum* are shown in red. Purple shows placement of an ALT domain trimmed from from an *Aureococcus anophagefferens* sequence, and is likely a contaminant. Pie charts to the right of each clade show the subcellular targeting predictions (TargetP) run on the untrimmed ORFs. Source data are provided as a Source Data file.

**Supplementary Table 1: Molecular components of nitrogen response regulation from diverse eukaryotes and candidate homologs in *Phaeodactylum tricornutum***

Eukaryotic genes involved in the cellular response to nitrogen (also including *Synechococcus*) compiled from the literature. Accession sources are specified, including Uniprot, Joint Genome Institute (JGI, <https://genome.jgi.doe.gov/>), *Cyanidioschyzon merolae* Genome Project v3 (<http://czon.jp>), or the National Center for Biotechnology Information (NCBI, <https://www.ncbi.nlm.nih.gov>). Pfams associated with reference sequences were obtained from Uniprot, or by *de novo* search in the Pfam 32.0 database. IDs for candidate homologs in *P. tricornutum* (Phatr3 models) are listed when single-candidate or highly nitrate sensitive (HNS) or nitrate sensitive (NS) genes were identified (see methods). ND = not detected.

| <b>Transcriptional Regulators</b> |                  |                                                 |                                  |                   |                                                                                |                              |                           |
|-----------------------------------|------------------|-------------------------------------------------|----------------------------------|-------------------|--------------------------------------------------------------------------------|------------------------------|---------------------------|
|                                   | <b>Gene Name</b> | <b>Protein</b>                                  | <b>Organism</b>                  | <b>Accession</b>  | <b>Pfam</b>                                                                    | <b>Phatr3 Candidate</b>      | <b>Reference(s)</b>       |
| wHT<br>H TF                       | <i>ntcA</i>      | Global nitrogen regulator                       | <i>Synechococcus sp.</i>         | A5GII0<br>Uniprot | PF13545 HTHCRP<br>(CL0123 Helix-turn-helix)                                    | ND                           | Vega-Palas et al. 1992    |
| R2-<br>R3<br>Myb                  | <i>myb1</i>      | MYB-related protein                             | <i>Cyanidioschyzon merolae</i>   | CMJ282C<br>Genome | PF00249 myb_DNA binding<br>PF13921 myb_DNA-bind_6<br>(CL0123 Helix-turn-helix) | n = 21<br>n = 9              | Imamura et al. 2009       |
| GATA-Type<br>TF                   | <i>Gln3</i>      | Nitrogen regulatory protein GLN3                | <i>Saccharomyces cerevisiae</i>  | P18494<br>Uniprot | PF00320 GATA<br>(CL0167 Zinc beta ribbon)                                      | ND                           | Ghaemmaghmi et al. 2003   |
|                                   | <i>Gat1</i>      | Transcriptional regulatory protein GAT1         | <i>Saccharomyces cerevisiae</i>  | P43574<br>Uniprot | PF00320 GATA<br>PF08550 DUF1752                                                | ND<br>ND                     | Ghaemmaghmi et al. 2003   |
|                                   | <i>area</i>      | Nitrogen regulatory protein areA                | <i>Emericella nidulans</i>       | P17429<br>Uniprot | PF07573 AreA_N<br>PF08550 DUF1752<br>PF00320 GATA                              | ND<br>ND<br>ND               | Marzluf 1997<br>Todd 2016 |
|                                   | <i>nit-2</i>     | Nitrogen catabolic enzyme regulatory protein    | <i>Neurospora crassa</i>         | P19212<br>Uniprot | PF08550 DUF1752<br>PF00320 GATA                                                | ND<br>ND                     | Marzluf 1997<br>Todd 2016 |
| RWP-<br>RK TF                     | <i>Nit2</i>      | Nitrate assimilation regulatory protein         | <i>Chlamydomonas reinhardtii</i> | Q2LGZ3<br>Uniprot | PF02042 RWP-RK<br>(no CL)                                                      | ND                           | Sanz-Luque et al. 2015    |
|                                   | <i>Nlp7</i>      | Protein NLP7                                    | <i>Arabidopsis thaliana</i>      | Q84TH9<br>Uniprot | PF02042 RWP-RK                                                                 | ND                           | Marchive et al. 2013      |
| Zn-clust<br>TF                    | <i>nirA</i>      | Nitrogen assimilation transcription factor nirA | <i>Emericella nidulans</i>       | P28348<br>Uniprot | PF04082 Fungal_trans<br>PF00172 Zn_clust                                       | ND<br>n = 1<br><b>J50045</b> | Marzluf 1997<br>Todd 2016 |

**Posttranscriptional/Posttranslational Regulators**

|                         | <b>Gene</b>         | <b>Protein</b>                                                                            | <b>Organism</b>                  | <b>Accession</b>      | <b>PFam</b>                                            | <b>Phatr3 Homolog</b>                                                                            | <b>Reference(s)</b>                   |
|-------------------------|---------------------|-------------------------------------------------------------------------------------------|----------------------------------|-----------------------|--------------------------------------------------------|--------------------------------------------------------------------------------------------------|---------------------------------------|
| nmrA                    | <i>nmrA</i>         | Nitrogen metabolite repression protein nmrA                                               | <i>Emericella nidulans</i>       | Q5AU62<br>Uniprot     | PF05368 NmrA                                           | n = 5<br><b>J31822 - HNS</b>                                                                     | Marzluf 1997<br>Todd 2016             |
|                         | <i>nmr</i>          | Nitrogen metabolite repression protein nmr                                                | <i>Neurospora crassa</i>         | P23762<br>Uniprot     | PF05368 NmrA                                           |                                                                                                  | Marzluf 1997<br>Todd 2016             |
|                         | <i>PcNMRA4</i>      | Transcriptional regulator of biotrophy to necrotrophy transition                          | <i>Phytophthora capsici</i>      | 505845<br>Phyca11 JGI | PF05368 NmrA                                           |                                                                                                  | Pham et al. 2018                      |
| Gluta-redoxin           | <i>URE2</i>         | Transcriptional regulator URE2                                                            | <i>Saccharomyces cerevisiae</i>  | P23202                | PF00043 GST_CTER<br>PF02798 GST_NTER                   | n = 7<br>n = 3                                                                                   | Coschigano & Magasanik 1991           |
| GC                      | <i>CYG56</i>        | Soluble guanylate cyclase                                                                 | <i>Chlamydomonas reinhardtii</i> | B6SE90<br>Uniprot     | PF00211 Guanylate_cyc<br>PF07700 HNOB<br>PF07701 HNOBA | n = 29<br>ND<br>ND                                                                               | Sanz-Luque et al. 2014                |
| Tandem Zn-finger        | <i>CrNZF1</i>       | Nitrate Zinc Finger 1                                                                     | <i>Chlamydomonas reinhardtii</i> | 512330<br>Chlre4 JGI  | PF00642 zf-CCCH                                        | n = 8<br><b>J50624 - HNS</b>                                                                     | Higuera et al. 2014                   |
| Truncated Hemoglobin    | <i>THB1</i>         | Putative truncated hemoglobin                                                             | <i>Chlamydomonas reinhardtii</i> | A8JAR4<br>Uniprot     | PF01152 Bac_globin                                     | n = 4<br><b>J37957 - HNS</b>                                                                     | Sanz-Luque et al. 2015                |
|                         | <i>HaNR2-2/2HbN</i> | Nitrate reductase, truncated hemoglobin fusion                                            | <i>Heterosigma akashiwo</i>      | JN831656<br>genbank   | PF01152 Bac_globin                                     |                                                                                                  | Stewart and Coyne 2011                |
|                         | <i>CsNR2-2/2HbN</i> | Nitrate reductase, truncated hemoglobin fusion                                            | <i>Chattonella subsalsa</i>      | JN831658<br>genbank   | PF01152 Bac_globin                                     |                                                                                                  |                                       |
| Kinase                  | <i>MPK6</i>         | Mitogen-activated protein kinase 6                                                        | <i>Arabidopsis thaliana</i>      | Q39026<br>Uniprot     | PF00069 Pkinase                                        | n = 125<br><b>J21961 - HNS</b><br><b>J15229 - HNS</b><br><b>J5286 - NS</b><br><b>J46233 - NS</b> | Wang et al. 2011                      |
| PII                     | <i>GLB1</i>         | Nitrogen regulatory protein PII                                                           | <i>Chlamydomonas reinhardtii</i> | A8JI83<br>Uniprot     | PF00543 P-II                                           | ND                                                                                               | Uhrig et al. 2009                     |
| ribosome binding GTPase | <i>NOA1</i>         | NO-associated protein 1, chloroplatic/mitochondrial (note: role in NO production dubious) | <i>Arabidopsis thaliana</i>      | Q66GP9<br>Uniprot     | PF01926 MMR_HSR1                                       | n = 28<br><b>J40200</b>                                                                          | Moreau et al. 2008, Vardi et al. 2008 |



## Supplementary Table 2: MEME Output

MEME version 5.0.4

ALPHABET= ACGT

strands: + -

Background letter frequencies (from unknown source):

A 0.270 C 0.230 G 0.230 T 0.270

MOTIF 1

log-odds matrix: alength= 4 w= 13 E= 9.1e-018

|       |       |       |       |
|-------|-------|-------|-------|
| 31    | 34    | 62    | -369  |
| 143   | -247  | -114  | -111  |
| 155   | -346  | -188  | -111  |
| -11   | -88   | 112   | -111  |
| -1223 | -88   | -47   | 139   |
| -1223 | -1223 | 123   | 76    |
| -1223 | 203   | -247  | -369  |
| -89   | 186   | -1223 | -369  |
| -369  | -247  | 203   | -1223 |
| -1223 | -1223 | 212   | -1223 |
| 163   | -47   | -1223 | -1223 |
| 189   | -1223 | -1223 | -1223 |
| -52   | -188  | 166   | -369  |

letter-probability matrix: alength= 4 w= 13 nsites= 48 E= 9.1e-018

|          |          |          |          |
|----------|----------|----------|----------|
| 0.333333 | 0.291667 | 0.354167 | 0.020833 |
| 0.729167 | 0.041667 | 0.104167 | 0.125000 |
| 0.791667 | 0.020833 | 0.062500 | 0.125000 |
| 0.250000 | 0.125000 | 0.500000 | 0.125000 |
| 0.000000 | 0.125000 | 0.166667 | 0.708333 |
| 0.000000 | 0.000000 | 0.541667 | 0.458333 |
| 0.000000 | 0.937500 | 0.041667 | 0.020833 |
| 0.145833 | 0.833333 | 0.000000 | 0.020833 |
| 0.020833 | 0.041667 | 0.937500 | 0.000000 |
| 0.000000 | 0.000000 | 1.000000 | 0.000000 |
| 0.833333 | 0.166667 | 0.000000 | 0.000000 |
| 1.000000 | 0.000000 | 0.000000 | 0.000000 |
| 0.187500 | 0.062500 | 0.729167 | 0.020833 |

MEME version 5.0.4

ALPHABET= ACGT

strands: + -

Background letter frequencies (from unknown source):

A 0.270 C 0.230 G 0.230 T 0.270

MOTIF 2

log-odds matrix: alength= 4 w= 13 E= 2.5e-013

|       |       |       |       |
|-------|-------|-------|-------|
| 46    | 106   | -264  | -128  |
| 99    | -164  | 17    | -106  |
| -1240 | 117   | -18   | 4     |
| -1240 | -205  | -205  | 172   |
| 89    | -1240 | 106   | -386  |
| 189   | -1240 | -1240 | -1240 |
| -1240 | 198   | -1240 | -154  |
| -6    | -264  | -264  | 131   |
| -286  | -1240 | 206   | -1240 |
| -286  | -363  | -1240 | 181   |
| 104   | -1240 | 95    | -1240 |
| 189   | -1240 | -1240 | -1240 |
| 60    | -131  | 69    | -106  |

letter-probability matrix: alength= 4 w= 13 nsites= 54 E= 2.5e-013

|          |          |          |          |
|----------|----------|----------|----------|
| 0.370370 | 0.481481 | 0.037037 | 0.111111 |
| 0.537037 | 0.074074 | 0.259259 | 0.129630 |
| 0.000000 | 0.518519 | 0.203704 | 0.277778 |
| 0.000000 | 0.055556 | 0.055556 | 0.888889 |
| 0.500000 | 0.000000 | 0.481481 | 0.018519 |
| 1.000000 | 0.000000 | 0.000000 | 0.000000 |
| 0.000000 | 0.907407 | 0.000000 | 0.092593 |
| 0.259259 | 0.037037 | 0.037037 | 0.666667 |
| 0.037037 | 0.000000 | 0.962963 | 0.000000 |
| 0.037037 | 0.018519 | 0.000000 | 0.944444 |
| 0.555556 | 0.000000 | 0.444444 | 0.000000 |
| 1.000000 | 0.000000 | 0.000000 | 0.000000 |
| 0.407407 | 0.092593 | 0.370370 | 0.129630 |

**Supplementary Table 3: Sample details, library names, and corresponding accessions for transcriptomes from the N<sub>short</sub> experiment.**

Files are available at the NCBI Sequence Read Archive (SRA) under the identifier PRJNA311568. Replicate experiments are indicated (A or B). Sample ID corresponds to label in Supplementary Dataset 1.

| Rep. | Time point              | N Source | Sample ID | Library                                    | Accession  |
|------|-------------------------|----------|-----------|--------------------------------------------|------------|
| A    | Pretreatment 1 (exp)    | NH4+     | Pre_1_A   | <u>NH4 (NH4A-PE-IL1-1)</u>                 | SRX1922057 |
| A    | Pretreatment 2 (2 hr)   | N-       | Pre_2_A   | <u>N-free (NFREEA-PE-IL2-1)</u>            | SRX1922055 |
| A    | Pretreatment 3 (90 min) | NO3-     | Pre_3_A   | <u>NO3 spike (NO3SPIKEA-PE-IL3-1)</u>      | SRX1922059 |
| A    | 15 min                  | NO3-     | NO3-_4_A  | <u>T15 NO3 (T15NO3A-PE-IL5-1)</u>          | SRX1922074 |
| A    | 15 min                  | NO2-     | NO2-_4_A  | <u>T15 NO2 (T15NO2A-PE-IL6-1)</u>          | SRX1922065 |
| A    | 15 min                  | NH4+     | NH4+_4_A  | <u>T15 NH4 (T15NH4A-PE-IL7-1)</u>          | SRX1922063 |
| A    | 15 min                  | N-       | N-_4_A    | <u>T15 N-free (T15NFREEA-PE-IL4-1)</u>     | SRX1922061 |
| A    | 45 min                  | NO3-     | NO3-_5_A  | <u>T45 NO3 (T45NO3A-PE-IL9-1)</u>          | SRX1922093 |
| A    | 45 min                  | NO2-     | NO2-_5_A  | <u>T45 NO2 (T45NO2A-PE-IL10-1)</u>         | SRX1922091 |
| A    | 45 min                  | NH4+     | NH4+_5_A  | <u>T45 NH4 (T45NH4A-PE-IL11-1)</u>         | SRX1922089 |
| A    | 45 min                  | N-       | N-_5_A    | <u>T45 N-free (T45NFREEA-PE-IL8-1)</u>     | SRX1922076 |
| A    | 18 hr                   | NO3-     | NO3-_6_A  | <u>T-end NO3 (TENDNO3A-PE-IL26-1)</u>      | SRX1922107 |
| A    | 18 hr                   | NO2-     | NO2-_6_A  | <u>T-end NO2 (TENDNO2A-PE-IL27-1)</u>      | SRX1922105 |
| A    | 18 hr                   | NH4+     | NH4+_6_A  | <u>T-end NH4 (TENDNH4A-PE-IL28-1)</u>      | SRX1922097 |
| A    | 18 hr                   | N-       | N-_6_A    | <u>T-end N-free (TENDNFREEA-PE-IL12-1)</u> | SRX1922095 |
| B    | Pretreatment 1 (exp)    | NH4+     | Pre_1_B   | <u>NH4 (NH4B-PE-IL1-1)</u>                 | SRX1922058 |
| B    | Pretreatment 2 (2 hr)   | N-       | Pre_2_B   | <u>N-free (NFREEB-PE-IL2-1)</u>            | SRX1922056 |
| B    | Pretreatment 3 (90)     | NO3-     | Pre_3_B   | <u>NO3 spike (NO3SPIKEB-PE-IL3-1)</u>      | SRX1922060 |
| B    | 15 min                  | NO3-     | NO3-_4_B  | <u>T15 NO3 (T15NO3B-PE-IL5-1)</u>          | SRX1922075 |
| B    | 15 min                  | NO2-     | NO2-_4_B  | <u>T15 NO2 (T15NO2B-PE-IL6-1)</u>          | SRX1922073 |
| B    | 15 min                  | NH4+     | NH4+_4_B  | <u>T15 NH4 (T15NH4B-PE-IL7-1)</u>          | SRX1922064 |
| B    | 15 min                  | N-       | N-_4_B    | <u>T15 N-free (T15NFREEB-PE-IL4-1)</u>     | SRX1922062 |
| B    | 45 min                  | NO3-     | NO3-_5_B  | <u>T45 NO3 (T45NO3B-PE-IL9-1)</u>          | SRX1922094 |
| B    | 45 min                  | NO2-     | NO2-_5_B  | <u>T45 NO2 (T45NO2B-PE-IL10-1)</u>         | SRX1922092 |
| B    | 45 min                  | NH4+     | NH4+_5_B  | <u>T45 NH4 (T45NH4B-PE-IL11-1)</u>         | SRX1922090 |
| B    | 45 min                  | N-       | N-_5_B    | <u>T45 N-free (T45NFREEB-PE-IL8-1)</u>     | SRX1922088 |
| B    | 18 hr                   | NO3-     | NO3-_6_B  | <u>T-end NO3 (TENDNO3B-PE-IL26-1)</u>      | SRX1922108 |
| B    | 18 hr                   | NO2-     | NO2-_6_B  | <u>T-end NO2 (TENDNO2B-PE-IL27-1)</u>      | SRX1922106 |
| B    | 18 hr                   | NH4+     | NH4+_6_B  | <u>T-end NH4 (TENDNH4B-PE-IL28-1)</u>      | SRX1922098 |
| B    | 18 hr                   | N-       | N-_6_B    | <u>T-end N-free (TENDNFREEB-PE-IL12-1)</u> | SRX1922096 |

### Supplementary Table 4: Sample details and corresponding accessions for proteome from the N<sub>short</sub> experiment.

Files are available at the Proteomics IDentifications (PRIDE) database under the identifier PXD015061. Samples are from N<sub>short</sub> biological replicate experiment B. Pre-treatment samples: N-Free +2h B and NO<sub>3</sub> SPIKE B. Nitrogen treatments correspond to N-free B, NO<sub>2</sub> B, NO<sub>3</sub> B, and NH<sub>4</sub> B for nitrogen free, nitrite, nitrate, and ammonium respectively. T-15, T-45, and T-end correspond to 15 min, 45. Min, and 18 hr sampling times respectively.

| Dataset                                  | Accession | 113 ion          | 114 ion                     | 115 ion                    | 116 ion                    | 117 ion                    | 118 ion                    | 119 ion                     | 121 ion                     |
|------------------------------------------|-----------|------------------|-----------------------------|----------------------------|----------------------------|----------------------------|----------------------------|-----------------------------|-----------------------------|
| Andy0016_1_11Jul13_Pippin_12-12-39       | 112779    | 16, N-Free +2h B | 18, NO <sub>3</sub> SPIKE B | 20, T-15 N-free B          | 22, T-15 NO <sub>3</sub> B | 28, T-45 N-Free B          | 30, T-45 NO <sub>3</sub> B | 36, T-end N-free B          | 38, T-end NO <sub>3</sub> B |
| Andy0016_2_11Jul13_Pippin_12-12-39       | 112778    | 16, N-Free +2h B | 18, NO <sub>3</sub> SPIKE B | 20, T-15 N-free B          | 22, T-15 NO <sub>3</sub> B | 28, T-45 N-Free B          | 30, T-45 NO <sub>3</sub> B | 36, T-end N-free B          | 38, T-end NO <sub>3</sub> B |
| Andy0016_3_11Jul13_Pippin_12-12-39       | 112777    | 16, N-Free +2h B | 18, NO <sub>3</sub> SPIKE B | 20, T-15 N-free B          | 22, T-15 NO <sub>3</sub> B | 28, T-45 N-Free B          | 30, T-45 NO <sub>3</sub> B | 36, T-end N-free B          | 38, T-end NO <sub>3</sub> B |
| Andy0016_4_11Jul13_Pippin_12-12-39       | 112788    | 16, N-Free +2h B | 18, NO <sub>3</sub> SPIKE B | 20, T-15 N-free B          | 22, T-15 NO <sub>3</sub> B | 28, T-45 N-Free B          | 30, T-45 NO <sub>3</sub> B | 36, T-end N-free B          | 38, T-end NO <sub>3</sub> B |
| Andy0016_5_11Jul13_Pippin_12-12-39       | 112776    | 16, N-Free +2h B | 18, NO <sub>3</sub> SPIKE B | 20, T-15 N-free B          | 22, T-15 NO <sub>3</sub> B | 28, T-45 N-Free B          | 30, T-45 NO <sub>3</sub> B | 36, T-end N-free B          | 38, T-end NO <sub>3</sub> B |
| Andy0016_6_11Jul13_Pippin_12-12-39       | 112787    | 16, N-Free +2h B | 18, NO <sub>3</sub> SPIKE B | 20, T-15 N-free B          | 22, T-15 NO <sub>3</sub> B | 28, T-45 N-Free B          | 30, T-45 NO <sub>3</sub> B | 36, T-end N-free B          | 38, T-end NO <sub>3</sub> B |
| Andy0016_7_11Jul13_Pippin_12-12-39       | 112775    | 16, N-Free +2h B | 18, NO <sub>3</sub> SPIKE B | 20, T-15 N-free B          | 22, T-15 NO <sub>3</sub> B | 28, T-45 N-Free B          | 30, T-45 NO <sub>3</sub> B | 36, T-end N-free B          | 38, T-end NO <sub>3</sub> B |
| Andy0016_8_11Jul13_Pippin_12-12-39       | 112786    | 16, N-Free +2h B | 18, NO <sub>3</sub> SPIKE B | 20, T-15 N-free B          | 22, T-15 NO <sub>3</sub> B | 28, T-45 N-Free B          | 30, T-45 NO <sub>3</sub> B | 36, T-end N-free B          | 38, T-end NO <sub>3</sub> B |
| Andy0016_9_11Jul13_Pippin_12-12-39       | 112774    | 16, N-Free +2h B | 18, NO <sub>3</sub> SPIKE B | 20, T-15 N-free B          | 22, T-15 NO <sub>3</sub> B | 28, T-45 N-Free B          | 30, T-45 NO <sub>3</sub> B | 36, T-end N-free B          | 38, T-end NO <sub>3</sub> B |
| Andy0016_10_11Jul13_Pippin_12-12-39      | 112785    | 16, N-Free +2h B | 18, NO <sub>3</sub> SPIKE B | 20, T-15 N-free B          | 22, T-15 NO <sub>3</sub> B | 28, T-45 N-Free B          | 30, T-45 NO <sub>3</sub> B | 36, T-end N-free B          | 38, T-end NO <sub>3</sub> B |
| Andy0016_11_11Jul13_Pippin_12-12-39      | 112773    | 16, N-Free +2h B | 18, NO <sub>3</sub> SPIKE B | 20, T-15 N-free B          | 22, T-15 NO <sub>3</sub> B | 28, T-45 N-Free B          | 30, T-45 NO <sub>3</sub> B | 36, T-end N-free B          | 38, T-end NO <sub>3</sub> B |
| Andy0016_12_11Jul13_Pippin_12-12-39      | 112784    | 16, N-Free +2h B | 18, NO <sub>3</sub> SPIKE B | 20, T-15 N-free B          | 22, T-15 NO <sub>3</sub> B | 28, T-45 N-Free B          | 30, T-45 NO <sub>3</sub> B | 36, T-end N-free B          | 38, T-end NO <sub>3</sub> B |
| Andy0017_1_8Jul13_Pippin_12-12-39        | 112772    | 16, N-Free +2h B | 18, NO <sub>3</sub> SPIKE B | 24, T-15 NO <sub>2</sub> B | 26, T-15 NH <sub>4</sub> B | 32, T-45 NO <sub>2</sub> B | 34, T-45 NH <sub>4</sub> B | 40, T-end NO <sub>2</sub> B | 42, T-end NH <sub>4</sub> B |
| Andy0017_2_8Jul13_Pippin_12-12-39        | 112783    | 16, N-Free +2h B | 18, NO <sub>3</sub> SPIKE B | 24, T-15 NO <sub>2</sub> B | 26, T-15 NH <sub>4</sub> B | 32, T-45 NO <sub>2</sub> B | 34, T-45 NH <sub>4</sub> B | 40, T-end NO <sub>2</sub> B | 42, T-end NH <sub>4</sub> B |
| Andy0017_3_8Jul13_Pippin_12-12-39        | 112789    | 16, N-Free +2h B | 18, NO <sub>3</sub> SPIKE B | 24, T-15 NO <sub>2</sub> B | 26, T-15 NH <sub>4</sub> B | 32, T-45 NO <sub>2</sub> B | 34, T-45 NH <sub>4</sub> B | 40, T-end NO <sub>2</sub> B | 42, T-end NH <sub>4</sub> B |
| Andy0017_4_Rerun_11Jul13_Pippin_12-12-39 | 112794    | 16, N-Free +2h B | 18, NO <sub>3</sub> SPIKE B | 24, T-15 NO <sub>2</sub> B | 26, T-15 NH <sub>4</sub> B | 32, T-45 NO <sub>2</sub> B | 34, T-45 NH <sub>4</sub> B | 40, T-end NO <sub>2</sub> B | 42, T-end NH <sub>4</sub> B |
| Andy0017_5_8Jul13_Pippin_12-12-39        | 112771    | 16, N-Free +2h B | 18, NO <sub>3</sub> SPIKE B | 24, T-15 NO <sub>2</sub> B | 26, T-15 NH <sub>4</sub> B | 32, T-45 NO <sub>2</sub> B | 34, T-45 NH <sub>4</sub> B | 40, T-end NO <sub>2</sub> B | 42, T-end NH <sub>4</sub> B |
| Andy0017_6_8Jul13_Pippin_12-12-39        | 112782    | 16, N-Free +2h B | 18, NO <sub>3</sub> SPIKE B | 24, T-15 NO <sub>2</sub> B | 26, T-15 NH <sub>4</sub> B | 32, T-45 NO <sub>2</sub> B | 34, T-45 NH <sub>4</sub> B | 40, T-end NO <sub>2</sub> B | 42, T-end NH <sub>4</sub> B |
| Andy0017_7_8Jul13_Pippin_12-12-39        | 112793    | 16, N-Free +2h B | 18, NO <sub>3</sub> SPIKE B | 24, T-15 NO <sub>2</sub> B | 26, T-15 NH <sub>4</sub> B | 32, T-45 NO <sub>2</sub> B | 34, T-45 NH <sub>4</sub> B | 40, T-end NO <sub>2</sub> B | 42, T-end NH <sub>4</sub> B |
| Andy0017_8_8Jul13_Pippin_12-12-39        | 112781    | 16, N-Free +2h B | 18, NO <sub>3</sub> SPIKE B | 24, T-15 NO <sub>2</sub> B | 26, T-15 NH <sub>4</sub> B | 32, T-45 NO <sub>2</sub> B | 34, T-45 NH <sub>4</sub> B | 40, T-end NO <sub>2</sub> B | 42, T-end NH <sub>4</sub> B |
| Andy0017_9_8Jul13_Pippin_12-12-39        | 112792    | 16, N-Free +2h B | 18, NO <sub>3</sub> SPIKE B | 24, T-15 NO <sub>2</sub> B | 26, T-15 NH <sub>4</sub> B | 32, T-45 NO <sub>2</sub> B | 34, T-45 NH <sub>4</sub> B | 40, T-end NO <sub>2</sub> B | 42, T-end NH <sub>4</sub> B |
| Andy0017_10_8Jul13_Pippin_12-12-39       | 112780    | 16, N-Free +2h B | 18, NO <sub>3</sub> SPIKE B | 24, T-15 NO <sub>2</sub> B | 26, T-15 NH <sub>4</sub> B | 32, T-45 NO <sub>2</sub> B | 34, T-45 NH <sub>4</sub> B | 40, T-end NO <sub>2</sub> B | 42, T-end NH <sub>4</sub> B |
| Andy0017_11_8Jul13_Pippin_12-12-39       | 112991    | 16, N-Free +2h B | 18, NO <sub>3</sub> SPIKE B | 24, T-15 NO <sub>2</sub> B | 26, T-15 NH <sub>4</sub> B | 32, T-45 NO <sub>2</sub> B | 34, T-45 NH <sub>4</sub> B | 40, T-end NO <sub>2</sub> B | 42, T-end NH <sub>4</sub> B |
| Andy0017_12_8Jul13_Pippin_12-12-39       | 112790    | 16, N-Free +2h B | 18, NO <sub>3</sub> SPIKE B | 24, T-15 NO <sub>2</sub> B | 26, T-15 NH <sub>4</sub> B | 32, T-45 NO <sub>2</sub> B | 34, T-45 NH <sub>4</sub> B | 40, T-end NO <sub>2</sub> B | 42, T-end NH <sub>4</sub> B |
